# Supplementary material for: Safety and efficacy of autologous and allogeneic humanized CD19-targeted CAR-T cell therapy for patients with relapsed/refractory B-ALL
Source: PubMed Central journal article supplement — J Immunother Cancer. 2023 Feb 20;11(2):e005701. doi: 10.1136/jitc-2022-005701 (PMC9944646; doi:10.1136/jitc-2022-005701), 2023-02-20
Supplement: jitc-2022-005701supp001.pdf [file jitc-2022-005701supp001.pdf]

### Comparison of the phenotypes and function between autologous and allogeneic hCART19

We assessed the expression of CD4, CD8, CD45RA and CD62L on the CAR-T cell products by flow cytometry. Compare to autologous hCART19, there was a higher CD4<sup>+</sup>:CD8<sup>+</sup> ratio (5.91 vs. 4.81; P=0.002) and CD4<sup>+</sup>CD45RA<sup>+</sup>CD62L<sup>+</sup> CAR-T cell percentages and lower percentages of CD4<sup>+</sup>CD45RA<sup>+</sup>CD62L<sup>-</sup> CAR-T cell and CD4<sup>+</sup>CD45RA<sup>-</sup>CD62L<sup>+</sup> CAR-T cells among allogeneic hCART19 (figure S1). There were no significant differences in persistence, outcomes and toxicity between the two groups (table S1 and S2).

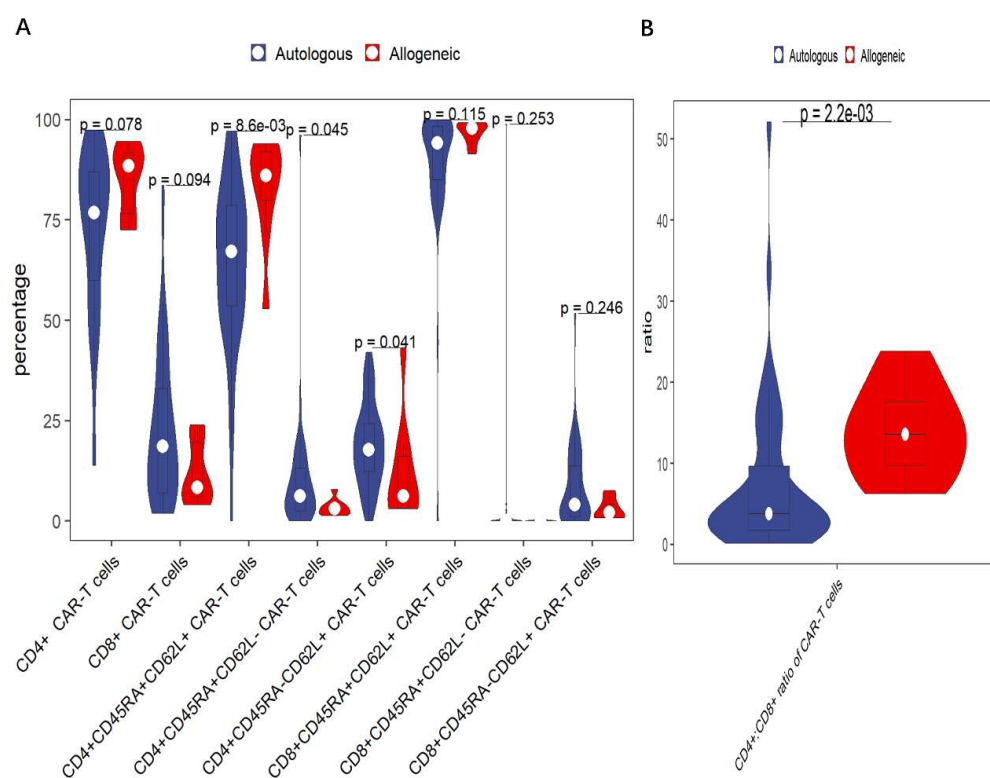

**Figure S1** Phenotypes according to CAR T source

**Table S1** Outcomes and persistence according to CAR-T source

| Characteristics                   | Autologous n=49 | Allogeneic n=9  | P value |
|-----------------------------------|-----------------|-----------------|---------|
| CRR%(95%CI)                       | 93.9(82.1-98.4) | 88.9(50.7-99.4) | 0.863   |
| OS% at 1 year (95%)               | 71.7(57.8-85.5) | 88.9(68.4-100)  | 0.52    |
| EFS% at 1 year (95%)              | 40(25-55)       | 88.9(68.4-100)  | 0.07    |
| Duration of B-cell aplasia (days) | 74(3-605)       | 117(26-616)     | 0.06    |

CRR, complete remission rate.

**Table S2** Toxicity according to CAR-T source

| Characteristics               | Autologous n=49 | Allogeneic n=9 | P value |
|-------------------------------|-----------------|----------------|---------|
| CRS of any grade              |                 |                |         |
| Grade 1-2                     | 30(61.2%)       | 7(77.8%)       | 0.567   |
| Grade $\geq$ 3                | 19(38.8%)       | 2(22.2%)       | 0.567   |
| ICANS of any grade            |                 |                |         |
| Grade 1-2                     | 1(2%)           | 0              | 1       |
| Grade $\geq$ 3                | 3(6.1%)         | 0              | 1       |
| Neutropenia of any grade      |                 |                |         |
| Grade 1-2                     | 11(22.4%)       | 1(11.1%)       | 0.746   |
| Grade $\geq$ 3                | 38(77.6%)       | 8(88.9%)       | 0.746   |
| Thrombocytopenia of any grade |                 |                |         |
| Grade 1-2                     | 10(20.4%)       | 0              | 0.335   |
| Grade $\geq$ 3                | 34(69.4%)       | 9(100%)        | 0.094   |
| Anemia of any grade           |                 |                |         |
| Grade 1-2                     | 8(16.3%)        | 1(11.1%)       | 0.917   |
| Grade $\geq$ 3                | 40(81.6%)       | 8(88.9%)       | 0.96    |

RS, cytokine release syndrome; ICANS, Immune effector cell-associated neurotoxicity syndrome.

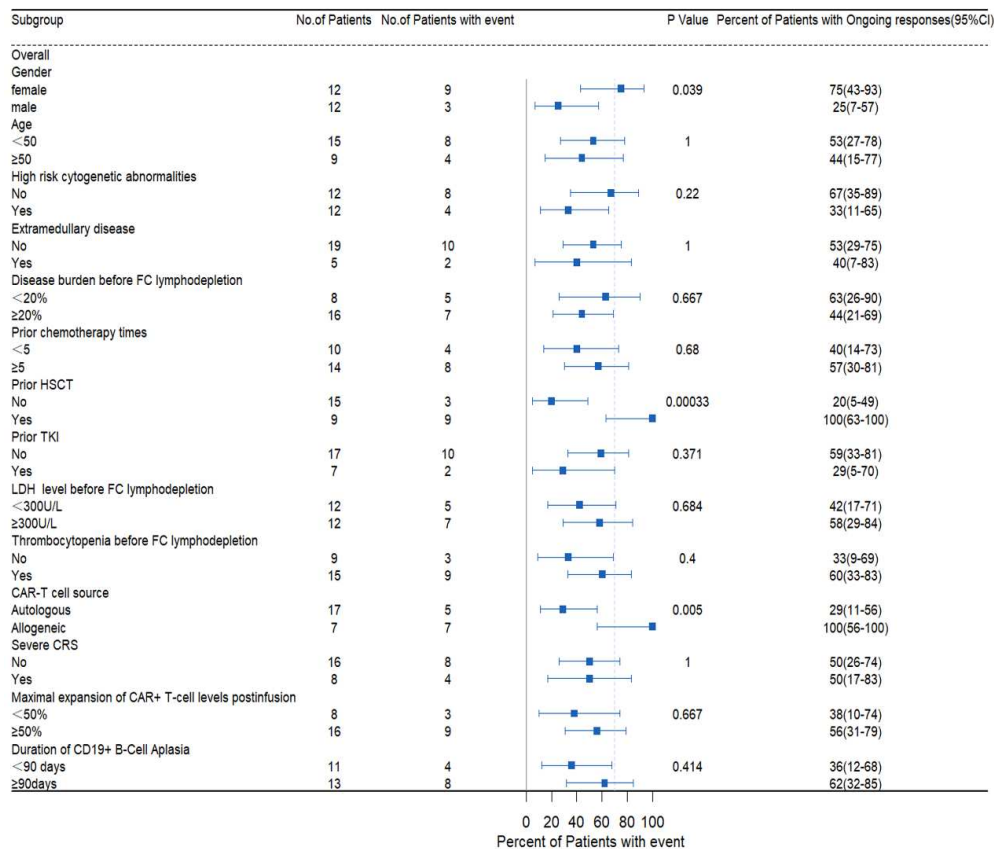

**Figure S2** Subgroup analysis of ongoing response in patients who received hCART19 alone. FC, fludarabine and cyclophosphamide; HSCT, hematopoietic stem cell transplantation; TKI tyrosine kinase inhibitor; LDH, lactate dehydrogenase; CAR-T, Chimeric antigen receptor T cell; CRS, cytokine release syndrome.

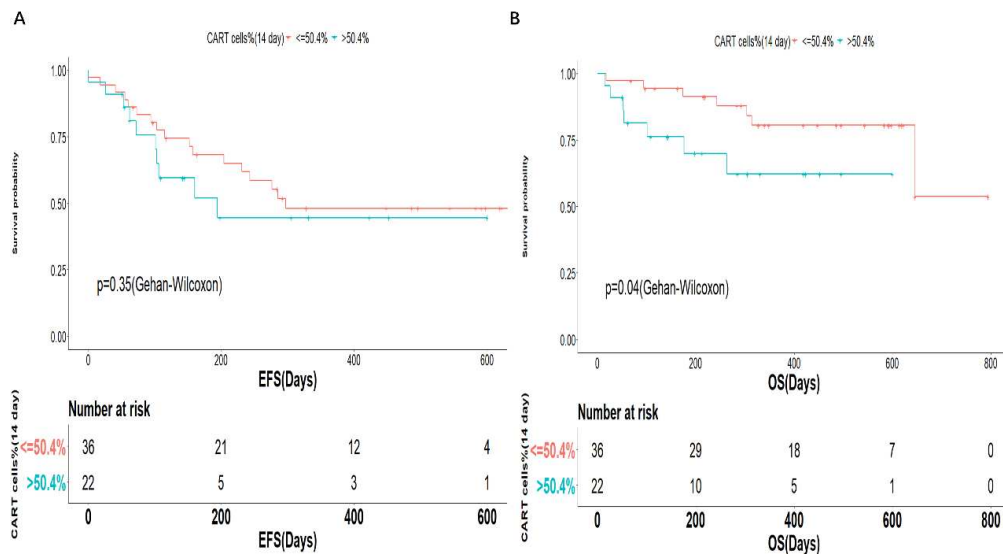

**Figure S3** Event-free survival (EFS) (A) and the overall survival (OS) (B) considering the percentage of CAR<sup>+</sup>/CD3<sup>+</sup> cells in peripheral blood (poor amplification  $\leq 50.4\%$ , good amplification  $>50.4\%$ ).

**Table S3** Univariate and multivariate analysis of clinical parameters on OS

| Characteristics                     | HR   | 95% CI      | P value      |
|-------------------------------------|------|-------------|--------------|
| <b>Univariate analysis</b>          |      |             |              |
| Gender                              | 1.32 | (0.43-4.04) | 0.624        |
| Age                                 | 1.15 | (0.40-3.30) | 0.795        |
| High-risk cytogenetic abnormalities | 2.36 | (0.79-7.07) | 0.124        |
| BM blasts before infusion           | 1.01 | (0.99-1.02) | 0.272        |
| Extramedullary disease              | 1.32 | (0.40-4.29) | 0.649        |
| Prior chemotherapy times            | 0.88 | (0.72-1.08) | 0.218        |
| Prior HSCT                          | 0.79 | (0.18-3.59) | 0.765        |
| Prior TKI                           | 1.52 | (0.51-4.54) | 0.457        |
| LDH before infusion                 | 1.00 | (1.00-1.00) | <b>0.001</b> |
| Thrombocytopenia before infusion    | 2.88 | (0.89-9.24) | 0.076        |
| CAR-T cell source                   | 0.52 | (0.07-4.01) | 0.531        |
| Consolidation therapy               | 0.80 | (0.39-1.67) | 0.557        |
| Duration of B-cell aplasia          | 0.98 | (0.96-0.99) | <b>0.006</b> |

**Multivariable analysis**

|                                            |      |            |              |
|--------------------------------------------|------|------------|--------------|
| Duration of B-cell aplasia                 | 0.96 | 0.95-0.99  | <b>0.005</b> |
| LDH before infusion                        | 1.00 | 1.00-1.00  | <b>0.009</b> |
| CAR-T cell percentages on day 14 (> 50.4%) | 3.71 | 0.93-14.82 | 0.063        |

BM, bone marrow; LDH, lactate dehydrogenase; HSCT, hematopoietic stem cell transplantation; CAR-T, Chimeric antigen receptor T cell; TKI, tyrosine kinase inhibitor.

**Table S4** Outcomes, toxicity and persistence according to CAR-T product

| Characteristics                   | hCART19 n=58    | mCART19 n=15    | P value          |
|-----------------------------------|-----------------|-----------------|------------------|
| CRR%(95%CI)                       | 93.1(83.6-97.3) | 80(54.8-93)     | 0.296            |
| OS% at 1 year (95%)               | 73.6(61-86.3)   | 53.3(28.1-78.6) | 0.094            |
| EFS% at 1 year (95%)              | 46(31.7-60.3)   | 10.3(0-29)      | <b>&lt;0.001</b> |
| Duration of B-cell aplasia (days) | 85(3-616)       | 49(0-78)        | <b>&lt;0.001</b> |
| CRS of any grade                  |                 |                 |                  |
| Grade1-2                          | 37(63.8%)       | 12(80%)         | 0.377            |
| Grade $\geq$ 3                    | 21(36.2%)       | 2(13.3%)        | 0.165            |
| ICANS of any grade                |                 |                 |                  |
| Grade1-2                          | 1(1.7%)         | 0               | 1                |
| Grade $\geq$ 3                    | 3(5.2%)         | 0               | 1                |
| aGVHD of any grade                |                 |                 |                  |
| Grade1-2                          | 3(5.2%)         | 1(6.7%)         | 0.682            |
| Grade $\geq$ 3                    | 1(1.7%)         | 1(6.7%)         | 0.874            |

CRR, complete remission rate; CRS, cytokine release syndrome; ICANS, Immune effector cell-associated neurotoxicity syndrome; aGVHD, acute graft-versus-host disease.
